# Supplementary material for: A novel nutritional score based on serum triglyceride and protein levels predicts outcomes of intrahepatic cholangiocarcinoma after curative hepatectomy: A multi-center study of 631 patients
Source: Frontiers journal article supplement (doi:10.3389/fnut.2022.964591), 2022-09-21
Supplement: Data_Sheet_1.pdf [file Data_Sheet_1.pdf]

## Supplementary tables

**Supplementary table 1. Comparison of characteristics with the different serum triglyceride levels and AGS grades of 114 ICC patients treated with surgical resection in the validation set.**

| Characteristics                                       | STG (mmol/L)    |                 | P value | AGS               |                       | P value |
|-------------------------------------------------------|-----------------|-----------------|---------|-------------------|-----------------------|---------|
|                                                       | <1<br>(n=53)    | ≥1<br>(n=61)    |         | Low (0)<br>(n=28) | High (1, 2)<br>(n=86) |         |
| Age, mean ± SD                                        | 55.7 ± 12.0     | 60.5 ± 10.1     | 0.054   | 55.8 ± 10.5       | 59.1 ± 11.3           | 0.165   |
| Gender, male, n (%)                                   | 26 (49.1%)      | 23 (37.7%)      | 0.222   | 12 (42.9%)        | 37 (43.0%)            | 0.988   |
| BMI kg/m <sup>2</sup> , mean ± SD                     | 25.8 ± 5.3      | 23.3 ± 2.9      | 0.121   | 24.4 ± 3.3        | 26.8 ± 5.6            | 0.898   |
| Cirrhosis, n (%)                                      | 10 (18.9%)      | 6 (9.8%)        | 0.166   | 4 (14.3%)         | 12 (14.0%)            | 0.965   |
| Ascites, n (%)                                        | 24 (45.3%)      | 31 (50.8%)      | 0.555   | 14 (50.0%)        | 41 (47.7%)            | 0.831   |
| Multiple tumors, n (%)                                | 16 (30.2%)      | 16 (26.2%)      | 0.639   | 6 (21.4%)         | 26 (30.2%)            | 0.368   |
| Tumor size (<5 cm), n (%)                             | 19 (35.8%)      | 27 (44.3%)      | 0.361   | 11 (39.3%)        | 35 (40.7%)            | 0.895   |
| Hepatolithiasis, n (%)                                | 8 (15.1%)       | 13 (21.3%)      | 0.393   | 5 (17.9%)         | 16 (18.6%)            | 0.929   |
| Microvascular invasion, n (%)                         | 36 (67.9%)      | 34 (55.7%)      | 0.182   | 13 (46.4%)        | 57 (66.3%)            | 0.061   |
| Vascular invasion, n (%)                              | 36 (67.9%)      | 35 (57.4%)      | 0.247   | 14 (50.0%)        | 57 (66.3%)            | 0.123   |
| Node positivity, n (%)                                | 15 (28.3%)      | 16 (26.2%)      | 0.804   | 6 (21.4%)         | 25 (29.1%)            | 0.43    |
| Biliary invasion, n (%)                               | 27 (50.9%)      | 31 (50.8%)      | 0.989   | 11 (39.3%)        | 47 (54.7%)            | 0.158   |
| Perineural invasion, n (%)                            | 12 (22.6%)      | 13 (21.3%)      | 0.864   | 6 (21.4%)         | 19 (22.1%)            | 0.941   |
| Liver capsule invasion, n (%)                         | 33 (62.3%)      | 29 (47.5%)      | 0.115   | 16 (57.1%)        | 46 (53.5%)            | 0.736   |
| Tumor differentiation, poor, n (%)                    | 41 (77.4%)      | 43 (70.5%)      | 0.406   | 19 (67.9%)        | 65 (75.6%)            | 0.42    |
| CA19-9, ≥22U/mL, n (%)                                | 41 (77.4%)      | 44 (72.1%)      | 0.523   | 16 (57.1%)        | 69 (80.2%)            | 0.015   |
| HBsAg (positive), n (%)                               | 15 (28.3%)      | 6 (9.8%)        | 0.011   | 3 (10.7%)         | 18 (20.9%)            | 0.226   |
| HCV, n (%)                                            | 1 (1.9%)        | 0 (0.0%)        | 0.465   | 0 (0.0%)          | 1 (1.2%)              | 1       |
| Child score, n (%)                                    |                 |                 | 0.994   |                   |                       | <0.001  |
| 5                                                     | 40 (75.5%)      | 46 (75.4%)      |         | 28 (100.0%)       | 58 (67.4%)            |         |
| 6                                                     | 13 (24.5%)      | 15 (24.6%)      |         | 0 (0.0%)          | 28 (32.6%)            |         |
| TNM stage, III, n (%)                                 | 35 (66.0%)      | 36 (59.0%)      | 0.44    | 16 (57.1%)        | 55 (64.0%)            | 0.518   |
| Overall survival, month, median (interquartile range) | 17.1 (6.7-56.9) | 30.9 (9.8-61.1) | 0.076   | 53.2 (9.6-65.2)   | 21.8 (9.2-54.3)       | 0.264   |

Abbreviations: STG, serum triglyceride; AGS, albumin-globulin score; CA19-9, cancer antigen 19-9; HBsAg, hepatitis B surface antigen; HCV, hepatitis C virus.

**Supplementary table 2. Comparison of characteristics with the different TAG grades of 114 ICC patients treated with surgical resection in the validation set.**

| Characteristics                                          | TAG grade           |                      |                     | P value |
|----------------------------------------------------------|---------------------|----------------------|---------------------|---------|
|                                                          | 1 (n=17)            | 2 (n=55)             | 3 (n=42)            |         |
| Age, mean $\pm$ SD                                       | 57.8 $\pm$ 10.4     | 59.8 $\pm$ 10.5      | 56.5 $\pm$ 12.3     | 0.436   |
| Gender, male, n (%)                                      | 5 (29.4%)           | 25 (45.5%)           | 19 (45.2%)          | 0.472   |
| BMI kg/m <sup>2</sup> , mean $\pm$ SD                    | 22.7 $\pm$ 3.6      | 23.1 $\pm$ 2.9       | 25.8 $\pm$ 3.1      | 0.326   |
| Cirrhosis, n (%)                                         | 1 (5.9%)            | 8 (14.5%)            | 7 (16.7%)           | 0.552   |
| Ascites, n (%)                                           | 10 (58.8%)          | 25 (45.5%)           | 20 (47.6%)          | 0.625   |
| Multiple tumors, n (%)                                   | 3 (17.6%)           | 16 (29.1%)           | 13 (31.0%)          | 0.572   |
| Tumor size (<5 cm), n (%)                                | 7 (41.2%)           | 24 (43.6%)           | 15 (35.7%)          | 0.731   |
| Hepatolithiasis, n (%)                                   | 4 (23.5%)           | 10 (18.2%)           | 7 (16.7%)           | 0.826   |
| Microvascular invasion, n (%)                            | 8 (47.1%)           | 31 (56.4%)           | 31 (73.8%)          | 0.091   |
| Vascular invasion, n (%)                                 | 8 (47.1%)           | 33 (60.0%)           | 30 (71.4%)          | 0.193   |
| Node positivity, n (%)                                   | 4 (23.5%)           | 14 (25.5%)           | 13 (31.0%)          | 0.779   |
| Biliary invasion, n (%)                                  | 6 (35.3%)           | 30 (54.5%)           | 22 (52.4%)          | 0.37    |
| Perineural invasion, n (%)                               | 4 (23.5%)           | 11 (20.0%)           | 10 (23.8%)          | 0.891   |
| Liver capsule invasion, n (%)                            | 8 (47.1%)           | 29 (52.7%)           | 25 (59.5%)          | 0.645   |
| Tumor differentiation, poor, n (%)                       | 12 (70.6%)          | 38 (69.1%)           | 34 (81.0%)          | 0.401   |
| CA19-9, $\geq$ 22U/mL, n (%)                             | 9 (52.9%)           | 42 (76.4%)           | 34 (81.0%)          | 0.075   |
| HBsAg (positive), n (%)                                  | 0 (0.0%)            | 9 (16.4%)            | 12 (28.6%)          | 0.032   |
| HCV, n (%)                                               | 0 (0.0%)            | 0 (0.0%)             | 1 (2.4%)            | 0.518   |
| Child score, n (%)                                       |                     |                      |                     | 0.035   |
| 5                                                        | 17 (100.0%)         | 40 (72.7%)           | 29 (69.0%)          |         |
| 6                                                        | 0 (0.0%)            | 15 (27.3%)           | 13 (31.0%)          |         |
| TNM stage, III, n (%)                                    | 9 (52.9%)           | 34 (61.8%)           | 28 (66.7%)          | 0.613   |
| Overall survival, month,<br>median (interquartile range) | 52.2 (9.6-<br>59.2) | 26.8 (11.4-<br>64.7) | 16.5 (6.9-<br>43.1) | 0.087   |

Abbreviations: TAG grade, triglyceride-albumin-globulin grade; CA19-9, cancer antigen 19-9; HBV, hepatitis B virus.

**Supplementary table 3. Univariate and multivariate analyses to determine independent predictors of overall survival in the validation set.**

| Variables                                | Univariate analysis |           |           | Multivariate analysis |           |         |
|------------------------------------------|---------------------|-----------|-----------|-----------------------|-----------|---------|
|                                          | HR                  | 95%CI     | P value   | HR                    | 95%CI     | P value |
| Gender, Female/Male                      | 0.982               | 0.62-1.56 | 0.9388    |                       |           |         |
| Age, $\geq 60$ / $<60$ (years)           | 0.991               | 0.62-1.57 | 0.9695    |                       |           |         |
| Cirrhosis                                | 1.3955              | 0.78-2.5  | 0.2639    |                       |           |         |
| Hepatolithiasis                          | 1.7803              | 1.03-3.07 | 0.038     | 2.5792                | 1.27-5.23 | 0.0086  |
| Tumor number,<br>Multiple/single         | 1.4726              | 0.9-2.4   | 0.1212    | 1.3654                | 0.79-2.37 | 0.268   |
| Tumor size, $\geq$<br>5/ $<5$ (cm)       | 1.5982              | 0.99-2.58 | 0.0558    | 1.7403                | 1.03-2.95 | 0.0397  |
| Tumor differentiation                    |                     |           |           |                       |           |         |
| Well                                     | Reference           |           |           | Reference             |           |         |
| Moderate                                 | 1.8447              | 1.16-3.15 | 0.0445    | 1.7549                | 1.03-3.79 | 0.0562  |
| Poor                                     | 2.2669              | 1.24-4.14 | 0.0077    | 2.1126                | 1.05-4.26 | 0.0363  |
| Microvascular invasion                   | 2.2208              | 0.87-5.61 | $<0.0001$ | 2.456                 | 0.92-4.37 | 0.0515  |
| Vascular invasion                        | 3.1063              | 1.13-5.66 | $<0.0001$ | 2.9743                | 0.96-4.33 | 0.0003  |
| Node positivity                          | 2.8774              | 1.77-4.67 | $<0.0001$ | 1.909                 | 1.12-3.25 | 0.017   |
| Liver capsule invasion                   | 1.46                | 0.91-2.33 | 0.1138    | 1.14                  | 0.79-2.21 | 0.078   |
| Perineural invasion                      | 2.2919              | 1.37-3.83 | 0.0015    | 1.3654                | 0.78-2.39 | 0.2747  |
| TAG grade                                |                     |           |           |                       |           |         |
| 1                                        | Reference           |           |           | Reference             |           |         |
| 2                                        | 1.3261              | 0.61-2.87 | 0.4744    | 1.3112                | 0.55-3.13 | 0.0241  |
| 3                                        | 2.1712              | 0.99-4.73 | 0.0509    | 2.097                 | 0.86-5.1  | 0.0041  |
| CA199 grade,<br>$\geq 22$ / $<22$ (U/ml) | 3.5858              | 1.78-7.23 | 0.0004    | 1.6635                | 0.78-3.53 | 0.185   |
| HBV                                      | 0.8607              | 0.47-1.57 | 0.6243    |                       |           |         |

Abbreviations: TAG grade, triglyceride-albumin-globulin grade; CA19-9, cancer antigen 19-9; HBV, hepatitis B virus.

### Supplementary figure legends

**Supplementary figure 1.** Identification for the cutoff values of TG (**A**), CHOL (**B**) and LDL-C (**C**) by X-tile analyses in the discovery set; TG, triglyceride; CHOL, cholesterol; LDL-C, low-density lipoprotein.

**Supplementary figure 2.** Kaplan-Meier curves for overall survival (**A**) and recurrence-free survival (**B**) stratified by the upper limit of normal range of the triglyceride concentration in the discovery set.

**Supplementary figure 3.** The ROC curves analyses to compare the ability of TG, FIB-4 and ALBI in predicting 1-year (**A, B**), 3-year (**C, D**) and 5-year (**E, F**) overall and recurrence-

free survival in the discovery set; TG, triglyceride; FIB-4, fibrosis-4 index; ALBI, albumin-bilirubin index.
